# **Title: Ancient Genomics Reveals Four Prehistoric Migration Waves into Southeast Asia**

**Authors:** Hugh McColl<sup>1,\*^</sup>, Fernando Racimo<sup>1,\*</sup>, Lasse Vinner<sup>1,\*</sup>, Fabrice Demeter<sup>1,2,\*</sup>, J. Víctor Moreno Mayar<sup>1</sup>, Uffe Gram Wilken<sup>1</sup>, Andaine Seguin-Orlando<sup>1</sup>, Constanza de la Fuente Castro<sup>1</sup>, Sally Wasef<sup>3</sup>, Ana Prohaska<sup>4</sup>, Ashot Margarayan<sup>1,5</sup>, Peter de Barros Damgaard<sup>1</sup>, Rasmi Shoocongdej<sup>6</sup>, Viengkeo Souksavady<sup>7</sup>, Thongsa Sayavongkhamdy<sup>7</sup>, Mohd Mokhtar Saidin<sup>8</sup>, Supanee Kaewsutthi<sup>9</sup>, Patcharee Lertrit<sup>9</sup>, Huong Mai Nguyen<sup>10</sup>, Hsiao-chun Hung<sup>11</sup>, Thi Minh Tran<sup>10</sup>, Huu Nghia Truong<sup>10</sup>, Shaiful Shahidan<sup>8</sup>, Ketut Wiradnyana<sup>12</sup>, Anne-Marie Bacon<sup>13</sup>, Philippe Durringer<sup>14</sup>, Jean-Luc Ponche<sup>14,15</sup>, Laura Shackelford<sup>16</sup>, Elise Patole-Edoumba<sup>17</sup>, Anh Tuan Nguyen<sup>10</sup>, Bérénice Bellina-Pryce<sup>18</sup>, Jean-Christophe Galipaud<sup>19</sup>, Rebecca Kinaston<sup>20</sup>, Hallie Buckley<sup>20</sup>, Christophe Pottier<sup>21</sup>, Simon Rasmussen<sup>22</sup>, Tom Higham<sup>23</sup>, Robert A. Foley<sup>24</sup>, Marta Mirazón Lahr<sup>24</sup>, Ludovic Orlando<sup>1,25</sup>, Martin Sikora<sup>1</sup>, Charles Higham<sup>20</sup>, David M. Lambert<sup>3</sup>, Eske Willerslev<sup>1,4,26,^</sup>

## **Affiliations:**

<sup>1</sup>Centre for GeoGenetics, Natural History Museum of Denmark, Copenhagen, Denmark.

<sup>2</sup>National Museum of Natural History, Ecoanthropology and Ethnobiology, Musée de l'Homme, Paris, France.

<sup>3</sup>Australian Research Centre for Human Evolution, Griffith University, Nathan, Australia.

<sup>4</sup>Department of Zoology, University of Cambridge, UK.

<sup>5</sup>Institute of Molecular Biology, National Academy of Sciences, Armenia.

<sup>6</sup>Department of Archaeology, Silpakorn University, Bangkok, Thailand.

<sup>7</sup>Department of Museums, Historic Buildings and Archaeology, Ministry of Information, Culture and Tourism, Lao Democratic People's Republic.

<sup>8</sup>Centre for Global Archaeological Research, Universiti Sains Malaysia, Malaysia.

<sup>9</sup>Department of Biochemistry, Faculty of Medicine Siriraj Hospital, Mahidol University, Bangkok, Thailand.

<sup>10</sup>Anthropological and Palaeoenvironmental Department, Institute of Archaeology, Hanoi, Vietnam.

<sup>11</sup>Department of Archaeology and Natural History, Australian National University, Canberra, Australia.

<sup>12</sup>Balai Archeology, Medan, Indonesia.

<sup>13</sup>Laboratoire AMIS, Université Paris Descartes, Faculté de chirurgie dentaire, Montrouge, Paris, France.

<sup>14</sup>École et Observatoire des Sciences de la Terre, Université de Strasbourg, Strasbourg, France.

<sup>15</sup>Institut de Chimie et Procédés pour l'Energie, l'Environnement et la Santé, Université de Strasbourg, France.

<sup>16</sup>Department of Anthropology, University of Illinois at Urbana-Champaign, USA.

<sup>17</sup>Natural History Museum of La Rochelle, La Rochelle, France.

<sup>18</sup>Prehistory and Technology, Maison Archéologie et Ethnologie, Nanterre, France.

<sup>19</sup>Research Institute for Development, National Museum of Natural History, UMR Paloc, France.

<sup>20</sup>Department of Anatomy, Otago School of Medical Sciences, University of Otago, Dunedin, New Zealand.

<sup>21</sup>École française d'Extrême-Orient, Paris, France.

<sup>22</sup>Department of Bio and Health Informatics, Technical University of Denmark, Denmark.

<sup>23</sup>Radiocarbon Accelerator Unit, University of Oxford, UK.

<sup>24</sup>Leverhulme Centre for Human Evolutionary, Studies, Department of Archaeology, University of Cambridge, UK.

<sup>25</sup>Laboratoire AMIS, Université Paul Sabatier (UPS), Toulouse, France

<sup>26</sup>Wellcome Trust Sanger Institute, UK.

\* Joint first authors

^ Corresponding authors (HM - [hmccoll@snm.ku.dk](mailto:hmccoll@snm.ku.dk) and EW - [ewillerslev@snm.ku.dk](mailto:ewillerslev@snm.ku.dk))

**Abstract: Two distinct population models have been put forward to explain present-day human diversity in Southeast Asia. The first model proposes long-term continuity (Regional Continuity model) while the other suggests two waves of dispersal (Two Layer model). Here, we use whole-genome capture in combination with shotgun sequencing to generate 25 ancient human genome sequences from mainland and island Southeast Asia,**

**and directly test the two competing hypotheses. We find that early genomes from Hoabinhian hunter-gatherer contexts in Laos and Malaysia have genetic affinities with the Onge hunter-gatherers from the Andaman Islands, while Southeast Asian Neolithic farmers have a distinct East Asian genomic ancestry related to present-day Austroasiatic-speaking populations. We also identify two further migratory events, consistent with the expansion of speakers of Austronesian languages into Island Southeast Asia ca. 4 kya, and the expansion by East Asians into northern Vietnam ca. 2 kya. These findings support the Two Layer model for the early peopling of Southeast Asia and highlight the complexities of dispersal patterns from East Asia.**

## **Main Text:**

The population history of Southeast Asia (SEA) has been shaped by interchanging periods of isolation and connectivity. Anatomically modern humans first colonized SEA at least 70,000 years ago (kya) (1–3). Within SEA, the complex topography and changes in sea level promoted regional expansions and contractions of populations. By the late Pleistocene/early Holocene, a pan-regional lithic technological culture was established across mainland SEA, named Hoabinhian (4–7). Hoabinhian foragers are thought to be the ancestors of present-day SEA hunter-gatherers, sometimes referred to as ‘Negritos’ because of their comparatively darker skin colour and short stature. Today, however, the majority of people in SEA are believed to be descendants of rice and millet farmers with varying degrees of East Asian phenotypic affinity, suggesting that human diversity in SEA was strongly influenced by population expansions from the north (4). Yet, the extent to which the movements from East Asia (EA) impacted on the genetic and cultural makeup of the people of SEA remains controversial.

Two distinct population models have been proposed to account for the biological and cultural diversity of human populations in present-day SEA. The Regional Continuity model, based primarily on morphological evidence, argues for a long-standing evolutionary continuity without significant external gene flow and for the Neolithic transition in SEA occurring as hunter-gatherer groups adopted agriculture, either independently or through cultural contact (8–21). While this model does not necessarily argue for the independent domestication of crops across SEA, it posits that gene flow from EA farmers was not the main mechanism behind the

Neolithic transition. In contrast, the Two Layer model advocates for two major dispersal waves into SEA, where EA farmers replaced the original Hoabinhian inhabitants across SEA through a major demographic southward expansion *ca.* 4 kya. The exception to this would be the isolated populations of the Andaman Islands, peninsular Thailand/Malaysia and the Philippines which are considered the primary descendants of Hoabinhian hunter-gatherers (22, 23). Under this model, the migratory wave of farmers originated in present-day China, where rice and millet were fully domesticated in the Yangtze and Yellow River valleys between 9-5.5 kya, and paddy fields developed by 4.5 kya (4, 24–26). Farming practices are thought to have accompanied these populations as they spread southward through two main routes – an inland wave associated with the expansion of Austroasiatic languages, and an island-hopping route associated with Austronesian languages which eventually reached the Pacific (27, 28). Within mainland SEA (MSEA), exchanges with EA appear to have continued in the recent past, however, the extent to which these expansions had a genetic impact on the indigenous populations is unknown.

Genetic studies of contemporary SEA populations have not resolved these controversies (29–32). Ancient genomics can provide direct evidence of past population events. However, SEA is characterised by tropical and monsoonal climates which cause heavy weathering and acidification of soils (33), so ancient genomic studies have, so far, been unsuccessful there. Though shotgun sequencing has revolutionized ancient genomic studies by allowing the retrieval of all mappable DNA fragments from an ancient sample (34, 35), the inverse relationship between the proportion of endogenous DNA and the cost of shotgun sequencing makes this approach impractical to apply widely to regions with poor DNA preservation such as SEA. Genome wide SNP capture is one way to circumvent the issue (36, 37), but it retrieves only a pre-selected subset of all variants of the genome and thus sacrifices the full potential of rare and irreplaceable fossil samples. An alternative approach is whole genome capture in which human ancient human DNA fragments are enriched through hybridisation to baits that cover the entire mappable human genome (15).

We performed comparative testing of three different capture approaches for human DNA - the SeqCap EZ Human Exome Kit v3.0 cat no. 6740294001 (Roche Nimblegen, CA, USA), the SureSelect Human All Exon V5+UTRs cat. no. 5190-6213 (Agilent Technologies) and the Custom MYbaits Whole Genome Enrichment (WGE) Kit version 2.0 (Arbor

Biosciences) - with the aim of applying the most effective method to ancient human remains from tropical SEA (SOM1). We found a modified version of MYbaits Whole Genome Enrichment to be the best-performing method. We applied this method, in combination with shotgun sequencing approaches where sufficient endogenous DNA allowed it, to samples from Malaysia, Thailand, Philippines, Vietnam, Indonesia and Laos, dating between 0.2 and 8 kya (SOM2). We obtained 25 low-coverage ancient genomes (Table 1), along with mtDNA and nuclear DNA from an additional set of 16 individuals (Table S3), belonging to hunter-gatherers from the Hoabinhian culture, as well as Neolithic, Bronze Age and Iron Age farmers (SOM3). All samples showed damage patterns typical of ancient DNA (38) (Table S3).

To address the genetic relationships among the ancient individuals, we performed a principal component analysis (PCA) with our Pan-Asia Panel (see Methods) using *smartpca* (39). We projected the ancient samples onto the first two principal components of a PCA constructed solely with present-day samples (40) (SOM4). We then used ADMIXTURE (41) to find reference latent ancestry components that could best fit our present-day data, and then used *fastNGSadmix* (42, 43) to model the low-coverage ancient samples as mixtures of these reference components (SOM5). Unlike all other ancient samples, the two Hoabinhian samples (which also happen to be the oldest samples in our study) - Pha Faen, Laos (La368 -  $^{14}\text{C}$  7,888  $\pm$  40) and Gua Cha, Malaysia (Ma911 -  $^{14}\text{C}$  4,319  $\pm$  64) - designated as Group 1, cluster distantly from most East and Southeast Asians in the PCA and position closely to present-day Onge (Figure 1A). Group 1 individuals also contain a mixture of several different ancestral components in the *fastNGSadmix* plot, including components shared with Onge, the Pahari and Spiti from India, Papuans and Jehai (a Malaysian ‘Negrito’ group), which are markedly different from the other SEA ancient samples. This possibly results from our modeling of ancient populations as a mixture of components inferred in present-day populations, via *fastNGSadmix* (44), and from the fact the ancient samples are likely poorly represented by a single present-day group. The rest of the ancient samples are defined primarily by East and Southeast Asian components that are maximised in present-day Austroasiatic (Mlabri and Htin), Austronesian (Ami) and Hmong (indigenous to the mountainous regions of China, Vietnam, Laos and Thailand) populations, along with a broad East Asian component.

We used outgroup  $f_3$  statistics ( $f_3(\text{Mbuti}; \text{X}, \text{Ancient samples})$ ) to determine which populations have the highest levels of shared drift with each of the ancient individuals (SOM6).

Group 1 shares the most drift with certain ancient mainland samples (Figure S12, Table S4). Again, we see that the closest present-day populations to Group 1 are from the Andaman Islands (Onge) and then Kensiu (a Malaysian ‘Negrito’ group), Ami and Jehai, followed by a mix of East and Southeast Asian populations.

We used D-statistics of the form  $D(\text{Papuan}, \text{Tianyuan}, X, \text{Mbuti})$ , where X is a test population, to explore the relatedness of ancient and present-day Southeast Asians to two highly differentiated groups: Papuans and an ancient northern East Asian individual (Tianyuan - a 40 kya-old sample from Northeastern China (45)). The values of this D-statistic are consistent with present-day and ancient SEA mainland samples being more closely related to Tianyuan than to Papuans (SOM7). This applies to present-day northern EA populations, and - more weakly - to most populations of ancient and present-day SEA. However, this D-statistic is not significantly different from 0 in present-day Jehai, Onge, Jarawa and Group 1 - the ancient Hoabinhians (Figure 2B, Tables S12, SOM7). While the Onge’s relationship with Papuans and Tianyuan is unclear, D-statistics of the form  $D(\text{Onge}, \text{Tianyuan}, X, \text{Mbuti})$ , where X is a test population, show that Jarawa, Jehai and the ancient Group 1 share more ancestry with Onge than with Tianyuan (Figure 2C, SOM7). Like the Onge, both Group 1 samples carry mtDNA haplogroups from the M lineage (Table S3), thought to represent the coastal migration to Australasia (12, 13, 28, 46).

To assess the diversity among the remaining ancient individuals, we computed a new PCA including only EA and SEA populations that did not have considerable Papuan or Onge-like ancestry in the *fastNGSadmix* analysis (Figure S11), as it was done in the Pan-Asian SNP-capture study (30). We observe that the remaining ancient samples form five slightly differentiated clusters within the EA and SEA populations (Groups 2-6, Figure 1B), in broad concordance with the *fastNGSadmix* (at  $K=13$ , Figure 1) and  $f_3$  results (Figure S12-S19; SOM4). We thus decided to organize these samples into five more groups to facilitate further analyses (Groups 2-6, Table 1), although we note that genetic differentiation among them seems to be highly clinal. Samples Vt719, Th531 and Vt778 were either geographic or temporal outliers to their groups and were therefore analyzed separately in groups denoted by a “.1”: Group 3.1 (Th531, Vt719) and Group 4.1 (Vt778).

Group 2 samples from Vietnam, Laos, and the Malay Peninsula are the oldest samples after Group 1, and range in age from 4.2 to 2.2 kya. At  $K = 6$  (SOM5), Group 2 individuals, the



present-day Mlabri and a single Htin individual are the only MSEA samples in the *fastNGSadmix* analysis to lack the broad EA component (dark green) maximised in northern EA, with the exception of the Malaysian ‘Negritos’ and ‘Proto-Malays’ (Temuan). At  $K = 7$ , a bright green component is maximised in these populations, and this component is also found in present-day Indonesian samples west of Wallace’s Line. The two ancient Indonesian samples (Group 5; 2.2 to 1.9 kya) represent a mix of Austronesian- and Austroasiatic-like ancestry, similar to present-day western Indonesians. Indeed, after Mlabri and Htin, the closest populations to Group 2 based on outgroup- $f_3$  statistics are the western Indonesian samples (from Bali and Java) reported to have the highest amounts of ancestry from mainland SEA (47) (Figure S13).

These lines of evidence suggest Group 2 are possible descendants of an “Austroasiatic” migration that expanded southward across MSEA and into island SEA (ISEA) by 4 kya (27, 47–49). We also observe a gradient in “Austronesian-like” vs. “Austroasiatic-like” ancestry in the PCA (Figure 1B): while PC1 separates populations found in SEA and those found in northern EA, PC2 distinguishes population based on their amounts of Austronesian-like ancestry (pink component in Figure 1 - lower panel) versus Austroasiatic-like ancestry (bright green component in Figure 1 - lower panel).

Group 6 samples are recent (between 1.8 and 0.2 kya) and come from Malaysia and the Philippines. They fall within the variation of present-day populations with high Austronesian ancestry in these areas. Group 6 also contains the individual (Ma554) with the highest amounts of Denisovan ancestry relative to the other ancient samples, although variation in archaic ancestry is not very strong across MSEA (SOM10).

The remaining mainland samples (Groups 3 and 4) are dated to be from 2.6 to 0.2 kya. They appear similar to present-day MSEA populations and fall into two groups. Group 3 is largely composed of ancient samples from Vietnam but also includes one sample from Thailand (Th531); these samples cluster in the PCA with the Dai from China, Tai-Kadai speakers from Thailand and Austroasiatic speakers from Vietnam, including the Kinh (Figures S9). In contrast, Group 4 largely contains ancient samples from Long Long Rak, Thailand, but also includes the inland-most sample from Vietnam (Vt778). These samples fall within the variation of present-day Austroasiatic and Sino-Tibetan speakers from Thailand and China, supporting the hypothesis that the Long Long Rak population originated in South China, and

subsequently expanded southward during the Dongson period (50). At Long Long Rak, three individuals (Th387, Th530 and Th531) dated to approximately 1.6 kya were found in the same chamber. Interestingly, all three individuals share the same mtDNA haplogroup (G2b1a), but the nuclear ancestries for the two samples which yielded genome-wide data are quite different: Th531 clusters best with Group 3, while Th530 with Group 4. These results suggests that individuals with ancestry from distant regions likely cohabited at this locality.

To determine if any of the ancient samples had affinities to particular populations outside SEA, we computed D-statistics of the form  $D(\text{Group A, Group B, Not-SEA, Yoruba/Mbuti})$  to compare each of the ancient groups. Group 2 has a significant affinity to the Indian populations of Khonda Dora ( $Z = 6.3$ ), relative to Group 3 ( $D(\text{Group2, Group3, Khonda Dora, Yoruba})$ ), in agreement with previous reports of East Asian ancestry in tribal Indian Groups (51, 52). We also investigated the affinity between certain Australasian populations and particular Native American groups, like the Surui (45, 53, 54). When computing  $D(\text{Mixe, Surui, X, Yoruba})$ , we find that the Group 1 samples had some suggestive but non-significant affinity to Surui relative to Mixe ( $Z = -2.18$  when  $X = \text{Ma911}$ ,  $Z = -2.48$  when  $X = \text{La368}$ ; Table S19), although the signal is not as robust as observed for Tianyuan ( $Z = -3.53$ ), Khonda Dora ( $Z = -3.04$ ) and Papuans ( $Z = -3.02$ ), among others (53, 54). We note, however, that there are much fewer SNPs to compute this statistic on Group 1 samples than on the other populations (La368: 191,797; Ma911: 47,816; Tianyuan: 295,628, Papuan: 471,703, Khonda Dora: 496,097), thus we may be underpowered to detect this signal.

We used *TreeMix* (55) to explore admixture graphs that could potentially fit our data. The ancient Group 1 (Onge-like) individuals are best modelled as a sister group to present-day Onge (Figures 3A, S21-S23). For the highest-coverage Group 1 sample, allowing for one migration, *TreeMix* fits Papuans as receiving admixture from Denisovans, while the second migration shows East Asian populations as resulting from admixture between Tianyuan and Onge.

We also performed a more supervised form of admixture graph modeling using *qpGraph* (36) (SOM9). We began with a skeletal framework containing chimpanzee (PanTro2, EPO alignment from Ensembl 71 (56, 57)), Denisova (58), Altai Neanderthal (59), Kostenki-14 (60), Mbuti, Onge, Ami and Papuan, fitting a graph based on results from Lipson and Reich (61) and well-supported D-statistics (SOM7). When not including Tianyuan, we find that the



Onge-Papuan-Ami split is hard to resolve (Figure S33), in agreement with Lipson and Reich (61). However, when including Tianyuan (Figure S34), we find that a best fit occurs when Ami (or Han) are modelled as an admixed group, with ancestry from a population related to Tianyuan and a population related to Onge (worst-fitting  $Z = -3.564$ ). In support of this graph assignment, we find that  $D(\text{Ami, Onge, Tianyuan, Mbuti}) = 0.0239$  ( $Z = 5.148$ ), while Papuan and Onge are a clade with respect to Tianyuan:  $D(\text{Papuan, Onge, Tianyuan, Mbuti}) = -0.0047$  ( $Z = -0.886$ ). We then added either La368 or Ma911 to the graph. In agreement with the *TreeMix* results, we find that La368 and Ma911 are each best modeled as a sister group to Onge (Figures S35 and S36, worst-fitting  $Z = 3.372$  and  $3.803$ , respectively).

We then used *qpWave/qpAdm* (62, 63) to determine if La368 and Ma911 can be modelled as a linear combination of ancestries from Papuans, Onge and/or Tianyuan without the need to invoke partial ancestry from a population that may have split from them before these populations split from each other. As outgroup populations, we used Yoruba (64), Ust-Ishim (65), Kostenki-14 (60), Mal'ta (66), Afontova Gora 3, Vestonice 16, El Mirón and Villabruna (67). All best 3-way and 2-way combinations for La368 are not feasible (have negative admixture weights). There are two 1-way possibilities (La368 as a sister group to either Onge or Papuans) that are feasible and are good fits ( $P = 0.37$  and  $P = 0.27$ , respectively), and this is somewhat expected as Onge and Papuans are sister clades to each other - barring Denisovan introgression into Papuans. When performing the same analysis on Ma911 as the target population, we find that all the best 3-way and 2-way combinations are also infeasible and the only good 1-way fit is with Onge ( $P = 0.49$ ). Modelling Ami as a linear combination of the same three source populations results in any of the 3-, 2- or 1-way fits being feasible and good fits, but the best fit is found in the 2-way combination of Tianyuan and Onge ( $P = 0.98$ ).

When modeling the Mlabri-like Group 2 in *TreeMix*, we see that the two samples with the highest coverage in this group (La364 and Ma912) form a clade, resulting from an admixture event between the ancestral populations of present-day East Asians (Han/Ami) and the ancestors of La368 (Figures 3B, S24-27). Despite the low SNP overlap (~20,000 SNPs) when including the Group 1 and 2 samples from Laos and Malaysia, (La368, Ma911, La364, Ma912), at 3 migrations, *TreeMix* residuals suggest that the Onge-like ancestry in Malaysia and Laos is a result of local admixture (Figure S27, SOM8). Additional data and higher

coverage samples from these regions are needed to better support a ‘local admixture’ model: including all four low-depth genomes in the same admixture graph results in only 17,286 overlapping SNPs (including transitions), which makes inference difficult. The Jehai are best fitted as an admixed population between Group 2 (Ma912) and the branch leading to present-day Onge and La368 (Figure 3C, S28). ISEA ancient samples from Indonesia (Group 5) and Borneo (Group 6) are best modelled as an admixed population carrying the signature of Group 2 (Figure 3D, Figures S29-33), supporting a previously reported mainland component in ISEA complementary to the well-documented Austronesian expansion (47). For the ISEA samples (Group 5 - In662 and Group 6 - Ma554), when a more basal migration event occurs, it originates from the Papuan branch, rather than the Onge branch as seen in MSEA.

Consistent with the *TreeMix* results, La364 in *qpGraph* is best modeled as a mixture of a population ancestral to Ami and the Group 1 / Onge-like population (Figure 3E, worst-fitting  $Z = 3.667$ ). Additionally, we find the best model for present-day Dai populations is a mixture of Group 2 individuals and an additional pulse of admixture from East Asians (Figure S37, worst-fitting  $Z = 3.66$ ).

This is the first study to reconstruct the population history of SEA using ancient DNA. We find that the genetic diversity found in present day SEA populations derives from at least four prehistoric population movements by the Hoabinhians, an “Austroasiatic-like” population, the Austronesians and, finally, additional EA populations into MSEA. We further show that the ancient mainland Hoabinhians (Group 1) shared ancestry with present-day Onge of the Andaman Islands and the Jehai of peninsular Malaysia. These results, together with the absence of significant Denisovan ancestry in these populations, suggest that the Denisovan admixture observed in Papuans occurred after their ancestors split from the ancestors of the Onge, Jehai and the ancient Hoabinhians. This is also consistent with the presence of substantial Denisovan admixture in the Mamanwa from the Philippines, which are best modeled as resulting from an admixture between Austronesians and Papuans, not Onge (61).

Consistent with the Two Layer model, we observe a dramatic change in ancestry by 4 kya (Group 2) which coincides with the introduction of farming, and thus supports models that posit a significant demographic expansion from EA into SEA during the Neolithic transition. Group 2 are the oldest samples with distinctive EA ancestry that we find. The most closely related present-day populations to Group 2 are the Mlabri and Htin - the Austroasiatic hill

tribes of Thailand - which is in agreement with hypotheses of an early Austroasiatic farmer expansion into the region. They also share ancestry with the Temuan and Jehai of Peninsular Malaysia and populations of Western Indonesia, supporting an Austroasiatic (“Western Route”) expansion into ISEA (post-Hoabinhian, pre-Austronesian), as previously proposed based on linguistic and archaeological grounds (27, 49, 68). Furthermore, a recent study also identified populations of Bali and Java as the groups in ISEA with the highest frequency of mainland SEA ancestry (47), also reflected in the large amounts of shared drift between Group 2 and the Javanese that we observe (Figure S13). The extent and nature of this Austroasiatic expansion into western Indonesia prior to the Austronesian expansion could be resolved by sequencing ancient genomes from ISEA prior to the Austronesian expansion.

By around 2 kya, all ancient mainland samples carry additional EA ancestry components that are absent in Group 2. Within the variation of these recent samples, we find two clusters of ancestry, possibly representing independent EA migrations into mainland SEA. Group 3 has affinities to the Hmong, the Dai from China, the Thai from Thailand and the Kinh from Vietnam, while Group 4 individuals - found only in inland regions - have affinities to Austroasiatic Thai and Chinese speakers. Finally, we also find evidence for the arrival of Austronesian ancestry into the Philippines by 1.8 kya (Group 6) and into Indonesia by 2.1 kya (Group 5). By 2 kya, the population structure in MSEA was very similar to that among present-day individuals. Despite observing a clear change in genetic structure coinciding with the transition from the Hoabinhian hunter-gatherers to Neolithic farmers, we also see a degree of local continuity at all sites at different points in time, suggesting that incoming waves of migration did not completely replace the previous occupants in each area (Figure 4).

This study demonstrates that whole-genome capture is an efficient supplementary approach for retrieving whole genomes from the fossil skeletal and dental remains found in the tropics. As target enrichment inevitably results in subsampling library fragments, it is most useful for (combined) libraries with high underlying complexity. We found a median 7.5 fold enrichment, reducing the sequencing costs proportionally. By enriching the human DNA content, we were able to acquire whole-genome data from selected samples in which the low proportion of endogenous DNA would have been previously prohibitive. The whole genome approach which we have employed here combines shotgun sequencing and capture in order to maximise the potential of ancient samples.

The clear genetic distinction between the Onge-like Hoabinhian and EA Neolithic demonstrated by this study provides an overwhelming support for the Two Layer model and indicates that in SEA, like in Europe, the onset of agriculture was accompanied by a demographic transition. However, on a more local level, our results point toward admixture events in northern Laos and Peninsula Malaysia between the two dispersal layers. We also show that the Hoabinhians of the first dispersal contributed a degree of ancestry to the incoming EA populations, which may have also resulted in the passing on of some phenotypic characteristics detected by proponents of the Continuity model. Finally, our results reveal that the appearance of these Austroasiatic farmers at around 4 kya was followed by multiple migrations of distinct EA ancestry. These subsequent migrations made significant contributions to the diversity of human populations in present-day SEA.

## **Methods:**

### **Samples**

We screened ancient samples from across SEA. We prioritized petrous bone, because of its favorable DNA preservation (69). Most of the samples were processed at the Centre for GeoGenetics, University of Copenhagen, with a few at Griffith University (Long Long Rak, Thailand; Th387, Th391, Th392, Th389, Th126, Th127, Th238, Th248), in dedicated clean laboratories following strict ancient DNA guidelines (69–71). Material was sampled as described in Hansen et al. (69). To minimize risk of contamination from handling, we performed a pre-digestion step (72). DNA extraction was done as in (73) followed by dual-indexed libraries building and amplification (74). Adapter-dimers were removed where necessary, using AMPure beads.

### **Sequencing, Mapping and Genotyping**

Sequencing was performed on Illumina Hiseq2500 (ver. 4) or Hiseq4000 instruments (81bp single-read) using bcl2fastq de-multiplexing. Adapters were trimmed using

*AdapterRemoval* v2.2.2 (75), and mapped to the human reference genome (hg19, build 37) using BWA (76, 77) (SOM3).

To minimize batch effects, we obtained genotypes for all individuals from a combination of published BAM files from previous studies and BAM files produced in this study. We genotyped genomes that had low coverage or were obtained from targeted capture by selecting the majority allele for the genomic position, looking only at reads with mapping quality  $\geq 30$  and base quality  $\geq 30$ . If both alleles were present at a site with equal coverage, a random allele was selected. High-coverage genomes were genotyped as in Sikora et al. (78). All analyses were restricted to regions that were within the 1000 Genomes Phase 3 (79) strict accessibility mask ([ftp://ftp.1000genomes.ebi.ac.uk/vol1/ftp/release/20130502/supporting/accessible\\_genome\\_masks/20141020.strict\\_mask.whole\\_genome.bed](ftp://ftp.1000genomes.ebi.ac.uk/vol1/ftp/release/20130502/supporting/accessible_genome_masks/20141020.strict_mask.whole_genome.bed)), and outside repeat regions (UCSC genome browser simpleRepeat table).

### **Damage/Contamination**

Using *mapDamage* v2 (80), we verified that all ancient samples displayed signatures of cytosine deamination and short fragment lengths, both typical of ancient DNA. For all samples in Table 1, contamination estimates obtained using *contamMix* (65) were minimal (MAP probability of authentic ancient DNA material = 0.94-0.99%, depending on the sample), while some of the very low coverage samples that were not sequenced to genome-wide depth had elevated contamination rates (Table S3). When practical, extracts were USER-treated (81) for deep sequencing after damage patterns were identified from screening results.

### **Reference Panels**

We assembled two panels for different types of analyses. Initial analyses were undertaken using the HUGO Pan-Asian SNP Database (30) (1,744 individuals; 50,796 SNPs) and Onge from the Simons Genome Diversity Panel (SGDP) (64), resulting in a panel maximising populations, at the expense of a lower SNP number, with 50,136 overlapping SNPs (hereafter the “Pan-Asia panel”). We assembled a second panel using whole genomes

from the SGDP, limiting to the 2,240k capture SNPs from Yang et al. (45). We used the first panel for ADMIXTURE / *fastNGSadmix* analyses and PCA, as well as  $f_3$  statistics. We used the second panel for more parameter-rich modelling.

## Principal Component Analysis

We performed a principal component analysis using *smartpca* v1600 implemented in the *Eigensoft* package (82) on the SNP covariance matrix of genomes from the Pan-Asia panel. We then projected all our ancient SEA samples onto the first two principal components (40) (SOM4).

## ADMIXTURE

We ran ADMIXTURE v1.3.0 (41) from  $K = 1$  to  $K = 13$  on the Pan-Asia Panel and the SGDP panel, after LD-pruning in PLINK (83), yielding 35,042 SNPs for analysis. To get standard errors for parameter estimates, we obtained 200 bootstrap replicates in each run. We then modeled low-coverage ancient populations based on the reference components inferred by ADMIXTURE, using *fastNGSadmix* (43). To visualise the admixture plots we used *pong* (84). Throughout this study, we generally refer to the colors corresponding to the ancestry components assuming  $K=13$ , unless otherwise stated.

## $f$ and $D$ statistics

We computed  $f$  and  $D$  statistics to measure the amount of shared drift between two populations, and to test gene-flow and treeness hypotheses, as detailed in Patterson et al. (36). For both analyses, we estimated standard errors through a weighted block jackknife procedure over 5Mb-blocks. For  $D$  statistics, we restricted the analysis to transversion polymorphisms in order to minimize potential bias introduced by differential error rates in ancient samples (mostly a consequence of *post-mortem* ancient DNA damage and low depth).

## TreeMix



We performed unsupervised admixture graph fitting of our ancient and present-day samples using *TreeMix* v1.13 (55) on the data. We used high coverage genomes from Denisovan, Mbuti, Kostenki, Papuan, Onge, Papuan, Tianyuan, Han and Ami as a base set of populations, and rooted the graph using Denisova as the outgroup. For each test, we only considered sites where all analysed populations had at least one individual with non-missing data and grouped SNPs in 5Mb blocks (-k parameter) to account for linkage disequilibrium. We observed that including transitions for ancient samples caused biases in inference and so removed transitions in all analyses. We show all graphs fitted in SOM8.

### **qpGraph**

We ran *qpGraph* v6100 from the *Admixtools* package (36), following parameter settings as in Lipson and Reich (61). We used fitted graphs with chimpanzee at the root, set “outpop” to be “NULL” to prevent use from specifying a particular outgroup population in which SNPs must be polymorphic, used a block size of 0.05 Morgans for the jackknife procedure, and used the full matrix form of the objective function, with “diag” set to 0.0001. Finally, we set a Z-score = 3 as the cutoff to label a statistic as an outlier. For further details, see SOM9.

### **Author Contributions:**

EW initiated the study. EW, DML, LV, LO, HM and FD designed the study. EW and DML supervised the overall project, while LV, FD, FR, VS, TS, MMS, RS, HMN, CH, KW, EPE, JCG, RK, HB and CP supervised specific aspects of the project. HM, LV, FD, UGW, CD, VS, TS, MMS, RS, SK, PL, HMN, HCH, TMT, THN, SS, KW, AMB, PD, JLP, LS, EPE, NAT, JCG, RK, HB and CP excavated, curated, sampled and/or described samples. HM, LV, ASO, SW, PBD, SR and TH produced data for analysis. HM, FR, LV, JVMM, CD, SW, AM, LO and MS analysed or assisted in the analysis of data. HM, FR, LV, FD, AM, LO, MS, CH, DML and EW interpreted the results. HM, FR, LV, FD, MML, RAF, CH, DML, EW wrote the manuscript with considerable input from JVMM, CD, SW, AP, VS, TS, MMS, RS, HMN,

HCH, THN, KW, TH and MS. All authors discussed the results and contributed to the final manuscript.

## Acknowledgements:

We thank the National High-throughput DNA Sequencing Centre (Copenhagen Denmark) for expert advice and sequencing of samples, the Duckworth Laboratory, University of Cambridge, for permission to sample material in their care, and Kristian Gregersen for making casts of teeth before sampling. This work was supported by the Lundbeck Foundation, the Danish National Research Foundation, and the KU2016 program. HM is supported by the George Murray Scholarship (University of Adelaide). RS thanks the Thailand Research Fund (TRF) for their support (Grants RTA6080001 and RDG55H0006). MML is supported by the ERC award 295907. DML was supported by ARC Grants LP120200144, LP150100583 and DP170101313. EW thanks St. John's College, University of Cambridge, for providing an inspiring environment for scientific thought.

## References

1. F. Demeter *et al.*, Early Modern Humans from Tam Pà Ling, Laos: Fossil Review and Perspectives. *Curr. Anthropol.* **58**, S527–S538 (2017).
2. L. Shackelford *et al.*, Additional evidence for early modern human morphological diversity in Southeast Asia at Tam Pa Ling, Laos. *Quat. Int.* **466**, 93–106 (2018).
3. K. E. Westaway *et al.*, An early modern human presence in Sumatra 73,000–63,000 years ago. *Nature*. **548**, 322–325 (2017).
4. C. Higham, *Early Mainland Southeast Asia: From First Humans to Angkor* (River Books Press Dist A C, 2014).
5. M. Colani, *L'âge de la Pierre dans la Province de hoa-binh (Tonkin): par Madeleine Colani* (Imprimerie d'Extrême-Orient, 1927).
6. E. Patole-Edoumba *et al.*, Evolution of the Hoabinhian techno-complex of Tam Hang rock shelter in Northeastern Laos. *Archaeological Discovery*. **3**, 140 (2015).
7. V. T. Ha, H. A. Van Tan, The Hoabinhian and before. *Bulletin of the Indo-Pacific Prehistory Association*. **16** (1997), doi:10.7152/bippa.v16i0.11643.

- 497 8. C. G. Turner 2nd, Teeth and prehistory in Asia. *Sci. Am.* **260**, 88–91, 94–6 (1989).
- 498 9. C. G. Turner 2nd, Major features of Sundadonty and Sinodonty, including suggestions about East  
499 Asian microevolution, population history, and late Pleistocene relationships with Australian  
500 aboriginals. *Am. J. Phys. Anthropol.* **82**, 295–317 (1990).
- 501 10. C. G. Turner, in *The evolution and dispersal of modern humans in Asia*, T. Akazawa, K. Aoki K.,  
502 T. Kimura, Ed. (Kokusensha, 1992), pp. 415–443.
- 503 11. T. Hanihara, Negritos, Australian Aborigines, and the “proto-sundadont” dental pattern: The basic  
504 populations in East Asia, V. *Am. J. Phys. Anthropol.* **88**, 183–196 (1992).
- 505 12. T. Hanihara, Craniofacial Features of Southeast Asians and Jomonese: A Reconsideration of Their  
506 Microevolution Since the Late Pleistocene. *Anthropol. Sci.* **101**, 25–46 (1993).
- 507 13. T. Hanihara, Population prehistory of East Asia and the Pacific as viewed from craniofacial  
508 morphology: The basic populations in East Asia, VII. *Am. J. Phys. Anthropol.* **91**, 173–187 (1993).
- 509 14. T. Hanihara, Cranial Morphological Contrasts between Negritos, Australians, and Neighboring  
510 Populations. *Anthropol. Sci.* **101**, 389–404 (1993).
- 511 15. T. Hanihara, Craniofacial continuity and discontinuity of Far Easterners in the Late Pleistocene  
512 and Holocene. *J. Hum. Evol.* **27**, 417–441 (1994).
- 513 16. T. Hanihara, in *Bioarchaeology of Southeast Asia* (2006), pp. 91–111.
- 514 17. M. Pietrusewsky, Japan, Asia and the Pacific: a multivariate craniometric investigation. *Japanese*  
515 *as a Member of the Asian and Pacific Populations. International Research Center for Japanese*  
516 *Studies, Kyoto*, 9–52 (1992).
- 517 18. M. Pietrusewsky, Pacific-Asian Relationships: A Physical Anthropological Perspective. *Oceanic*  
518 *Linguistics.* **33**, 407 (1994).
- 519 19. M. Pietrusewsky, in *Interdisciplinary Perspectives on the Origins of the Japanese, International*  
520 *Symposium* (1996), pp. 65–104.
- 521 20. M. Pietrusewsky, in *The peopling of East Asia: Putting together archaeology, linguistics and*  
522 *genetics*, L. Sagart, R. Blench, A. Sanchez-Mazos, Eds. (2005), pp. 201–229.
- 523 21. M. Pietrusewsky, in *Bioarchaeology of Southeast Asia* (2006), pp. 59–90.
- 524 22. P. S. Bellwood, The colonization of the Pacific: some current hypotheses. *The colonization of the*  
525 *Pacific: a genetic trail* (1989) (available at <https://ci.nii.ac.jp/naid/10031057350/>).
- 526 23. P. Bellwood, Early agriculture and the dispersal of the southern Mongoloids. *Prehistoric*  
527 *mongoloid dispersals*, 287–302 (1996).
- 528 24. Y. Zheng, G. W. Crawford, L. Jiang, X. Chen, Rice Domestication Revealed by Reduced  
529 Shattering of Archaeological rice from the Lower Yangtze valley. *Sci. Rep.* **6**, 28136 (2016).
- 530 25. D. Q. Fuller *et al.*, The domestication process and domestication rate in rice: spikelet bases from  
531 the Lower Yangtze. *Science.* **323**, 1607–1610 (2009).

- 532 26. Z. Yunfei *et al.*, Rice fields and modes of rice cultivation between 5000 and 2500 BC in east  
533 China. *J. Archaeol. Sci.* **36**, 2609–2616 (2009).
- 534 27. P. Sidwell, R. Blench, The Austroasiatic urheimat: the southeastern riverine hypothesis. Dynamics  
535 of Human diversity, the case of mainland Southeast Asia. *Pacific Linguistics*. **14**, 315–343 (2011).
- 536 28. D. Q. Fuller *et al.*, Consilience of genetics and archaeobotany in the entangled history of rice.  
537 *Archaeol. Anthropol. Sci.* **2**, 115–131 (2010).
- 538 29. D. Bulbeck, Craniodental affinities of Southeast Asia’s “negritos” and the concordance with their  
539 genetic affinities. *Hum. Biol.* **85**, 95–133 (2013).
- 540 30. HUGO Pan-Asian SNP Consortium *et al.*, Mapping human genetic diversity in Asia. *Science*. **326**,  
541 1541–1545 (2009).
- 542 31. T. A. Jinam *et al.*, Evolutionary history of continental southeast Asians: “early train” hypothesis  
543 based on genetic analysis of mitochondrial and autosomal DNA data. *Mol. Biol. Evol.* **29**, 3513–  
544 3527 (2012).
- 545 32. T. A. Jinam *et al.*, Discerning the Origins of the Negritos, First Sundaland People: Deep  
546 Divergence and Archaic Admixture. *Genome Biol. Evol.* **9**, 2013–2022 (2017).
- 547 33. R. D. Harter, Acid soils of the tropics. *Echo Technical Note. USA* (2007).
- 548 34. M. Rasmussen *et al.*, Ancient human genome sequence of an extinct Palaeo-Eskimo. *Nature*. **463**,  
549 757–762 (2010).
- 550 35. L. Orlando *et al.*, Recalibrating Equus evolution using the genome sequence of an early Middle  
551 Pleistocene horse. *Nature*. **499**, 74–78 (2013).
- 552 36. N. Patterson *et al.*, Ancient admixture in human history. *Genetics*. **192**, 1065–1093 (2012).
- 553 37. J. K. Pickrell, D. Reich, Toward a new history and geography of human genes informed by ancient  
554 DNA. *Trends Genet.* **30**, 377–389 (2014).
- 555 38. L. Orlando, M. T. P. Gilbert, E. Willerslev, Reconstructing ancient genomes and epigenomes. *Nat.*  
556 *Rev. Genet.* **16**, 395–408 (2015).
- 557 39. G. Abraham, M. Inouye, Fast Principal Component Analysis of Large-Scale Genome-Wide Data  
558 (2014), , doi:10.1101/002238.
- 559 40. P. Skoglund *et al.*, Origins and genetic legacy of Neolithic farmers and hunter-gatherers in Europe.  
560 *Science*. **336**, 466–469 (2012).
- 561 41. D. H. Alexander, J. Novembre, K. Lange, Fast model-based estimation of ancestry in unrelated  
562 individuals. *Genome Res.* **19**, 1655–1664 (2009).
- 563 42. L. Skotte, T. S. Korneliussen, A. Albrechtsen, Estimating individual admixture proportions from  
564 next generation sequencing data. *Genetics*. **195**, 693–702 (2013).
- 565 43. E. Jørsboe, K. Hanghøj, A. Albrechtsen, fastNGSadmix: admixture proportions and principal  
566 component analysis of a single NGS sample. *Bioinformatics*. **33**, 3148–3150 (2017).

- 567 44. D. Lawson, L. van Dorp, D. Falush, A tutorial on how (not) to over-interpret  
568 STRUCTURE/ADMIXTURE bar plots. *bioRxiv* (2016), doi:10.1101/066431.
- 569 45. M. A. Yang *et al.*, 40,000-Year-Old Individual from Asia Provides Insight into Early Population  
570 Structure in Eurasia. *Curr. Biol.* **27**, 3202–3208.e9 (2017).
- 571 46. Zhang Chi, Z. Chi, H.-C. Hung, The Neolithic of Southern China—Origin, Development, and  
572 Dispersal. *Asian Perspectives*. **47**, 299–329 (2009).
- 573 47. G. Hudjashov *et al.*, Complex Patterns of Admixture across the Indonesian Archipelago. *Mol. Biol.*  
574 *Evol.* **34**, 2439–2452 (2017).
- 575 48. M. Lipson *et al.*, Reconstructing Austronesian population history in Island Southeast Asia. *Nat.*  
576 *Commun.* **5**, 4689 (2014).
- 577 49. T. Simanjuntak, in *New Perspectives in Southeast Asian and Pacific Prehistory* (2017), pp. 201–  
578 211.
- 579 50. R. Shoocondej, *Coffin culture of Thailand in Southeast Asian context* (Charansanitwong Press,  
580 2017).
- 581 51. N. Rustagi *et al.*, Extremely low-coverage whole genome sequencing in South Asians captures  
582 population genomics information. *BMC Genomics*. **18**, 396 (2017).
- 583 52. A. Basu, N. Sarkar-Roy, P. P. Majumder, Genomic reconstruction of the history of extant  
584 populations of India reveals five distinct ancestral components and a complex structure.  
585 *Proceedings of the National Academy of Sciences*. **113**, 1594–1599 (2016).
- 586 53. P. Skoglund *et al.*, Genetic evidence for two founding populations of the Americas. *Nature*. **525**,  
587 104–108 (2015).
- 588 54. M. Raghavan *et al.*, Genomic evidence for the Pleistocene and recent population history of Native  
589 Americans. *Science*. **349**, aab3884 (2015).
- 590 55. J. K. Pickrell, J. K. Pritchard, Inference of population splits and mixtures from genome-wide allele  
591 frequency data. *PLoS Genet.* **8**, e1002967 (2012).
- 592 56. The Chimpanzee Sequencing and Analysis Consortium, Initial sequence of the chimpanzee  
593 genome and comparison with the human genome. *Nature*. **437**, 69–87 (2005).
- 594 57. B. Paten, J. Herrero, K. Beal, S. Fitzgerald, E. Birney, Enredo and Pecan: genome-wide  
595 mammalian consistency-based multiple alignment with paralogs. *Genome Res.* **18**, 1814–1828  
596 (2008).
- 597 58. M. Meyer *et al.*, A high-coverage genome sequence from an archaic Denisovan individual.  
598 *Science*. **338**, 222–226 (2012).
- 599 59. K. Prüfer *et al.*, The complete genome sequence of a Neanderthal from the Altai Mountains.  
600 *Nature*. **505**, 43–49 (2014).
- 601 60. A. Seguin-Orlando *et al.*, Paleogenomics. Genomic structure in Europeans dating back at least  
602 36,200 years. *Science*. **346**, 1113–1118 (2014).

- 603 61. M. Lipson, D. Reich, A working model of the deep relationships of diverse modern human genetic  
604 lineages outside of Africa. *Mol. Biol. Evol.*, msw293 (2017).
- 605 62. I. Lazaridis *et al.*, Ancient human genomes suggest three ancestral populations for present-day  
606 Europeans. *Nature*. **513**, 409–413 (2014).
- 607 63. D. Reich *et al.*, Reconstructing Native American population history. *Nature*. **488**, 370–374 (2012).
- 608 64. S. Mallick *et al.*, The Simons Genome Diversity Project: 300 genomes from 142 diverse  
609 populations. *Nature*. **538**, 201–206 (2016).
- 610 65. Q. Fu *et al.*, Genome sequence of a 45,000-year-old modern human from western Siberia. *Nature*.  
611 **514**, 445–449 (2014).
- 612 66. M. Raghavan *et al.*, Upper Palaeolithic Siberian genome reveals dual ancestry of Native  
613 Americans. *Nature*. **505**, 87–91 (2014).
- 614 67. Q. Fu *et al.*, The genetic history of Ice Age Europe. *Nature*. **534**, 200–205 (2016).
- 615 68. P. Bellwood, The prehistory of Island Southeast Asia: A multidisciplinary review of recent  
616 research. *Journal of World Prehistory*. **1**, 171–224 (1987).
- 617 69. H. B. Hansen *et al.*, Comparing Ancient DNA Preservation in Petrous Bone and Tooth Cementum.  
618 *PLoS One*. **12**, e0170940 (2017).
- 619 70. M. T. P. Gilbert, H.-J. Bandelt, M. Hofreiter, I. Barnes, Assessing ancient DNA studies. *Trends*  
620 *Ecol. Evol.* **20**, 541–544 (2005).
- 621 71. E. Willerslev, A. Cooper, Ancient DNA. *Proc. Biol. Sci.* **272**, 3–16 (2005).
- 622 72. P. de B. Damgaard *et al.*, Improving access to endogenous DNA in ancient bones and teeth (2015),  
623 , doi:10.1101/014985.
- 624 73. M. E. Allentoft *et al.*, Population genomics of Bronze Age Eurasia. *Nature*. **522**, 167–172 (2015).
- 625 74. M. Meyer, M. Kircher, Illumina sequencing library preparation for highly multiplexed target  
626 capture and sequencing. *Cold Spring Harb. Protoc.* **2010**, db.prot5448 (2010).
- 627 75. M. Schubert, S. Lindgreen, L. Orlando, AdapterRemoval v2: rapid adapter trimming,  
628 identification, and read merging. *BMC Res. Notes*. **9**, 88 (2016).
- 629 76. M. Schubert *et al.*, Improving ancient DNA read mapping against modern reference genomes.  
630 *BMC Genomics*. **13**, 178 (2012).
- 631 77. G. A. Van der Auwera *et al.*, in *Current Protocols in Bioinformatics* (2013), pp. 11.10.1–11.10.33.
- 632 78. M. Sikora *et al.*, Ancient genomes show social and reproductive behavior of early Upper  
633 Paleolithic foragers. *Science*. **358**, 659–662 (2017).
- 634 79. 1000 Genomes Project Consortium *et al.*, A global reference for human genetic variation. *Nature*.  
635 **526**, 68–74 (2015).
- 636 80. H. Jónsson, A. Ginolhac, M. Schubert, P. L. F. Johnson, L. Orlando, mapDamage2.0: fast



- 637 approximate Bayesian estimates of ancient DNA damage parameters. *Bioinformatics*. **29**, 1682–  
638 1684 (2013).
- 639 81. A. W. Briggs *et al.*, Removal of deaminated cytosines and detection of in vivo methylation in  
640 ancient DNA. *Nucleic Acids Res.* **38**, e87 (2010).
- 641 82. N. Patterson, A. L. Price, D. Reich, Population structure and eigenanalysis. *PLoS Genet.* **2**, e190  
642 (2006).
- 643 83. S. Purcell *et al.*, PLINK: A Tool Set for Whole-Genome Association and Population-Based  
644 Linkage Analyses. *Am. J. Hum. Genet.* **81**, 559–575 (2007).
- 645 84. A. A. Behr, K. Z. Liu, G. Liu-Fang, P. Nakka, S. Ramachandran, pong: fast analysis and  
646 visualization of latent clusters in population genetic data. *Bioinformatics*. **32**, 2817–2823 (2016).
- 647 85. L. Vinner *et al.*, Investigation of Human Cancers for Retrovirus by Low-Stringency Target  
648 Enrichment and High-Throughput Sequencing. *Sci. Rep.* **5**, 13201 (2015).
- 649 86. H. Li, R. Durbin, Fast and accurate short read alignment with Burrows-Wheeler transform.  
650 *Bioinformatics*. **25**, 1754–1760 (2009).
- 651 87. M. Schubert *et al.*, Characterization of ancient and modern genomes by SNP detection and  
652 phylogenomic and metagenomic analysis using PALEOMIX. *Nat. Protoc.* **9**, 1056–1082 (2014).
- 653 88. C. Der Sarkissian *et al.*, Evolutionary Genomics and Conservation of the Endangered Przewalski's  
654 Horse. *Curr. Biol.* **25**, 2577–2583 (2015).
- 655 89. A. W. Briggs *et al.*, Patterns of damage in genomic DNA sequences from a Neandertal. *Proc. Natl.*  
656 *Acad. Sci. U. S. A.* **104**, 14616–14621 (2007).
- 657 90. T. Daley, A. D. Smith, Predicting the molecular complexity of sequencing libraries. *Nat. Methods*.  
658 **10**, 325–327 (2013).
- 659 91. J. Z. Li *et al.*, Worldwide human relationships inferred from genome-wide patterns of variation.  
660 *Science*. **319**, 1100–1104 (2008).
- 661 92. M. L. Carpenter *et al.*, Pulling out the 1%: whole-genome capture for the targeted enrichment of  
662 ancient DNA sequencing libraries. *Am. J. Hum. Genet.* **93**, 852–864 (2013).
- 663 93. D. I. Cruz-Dávalos *et al.*, Experimental conditions improving in-solution target enrichment for  
664 ancient DNA. *Mol. Ecol. Resour.* **17**, 508–522 (2017).
- 665 94. J. M. Enk *et al.*, Ancient whole genome enrichment using baits built from modern DNA. *Mol.*  
666 *Biol. Evol.* **31**, 1292–1294 (2014).
- 667 95. J. Dabney, M. Meyer, Length and GC-biases during sequencing library amplification: a  
668 comparison of various polymerase-buffer systems with ancient and modern DNA sequencing  
669 libraries. *Biotechniques*. **52**, 87–94 (2012).
- 670 96. N. Tayles, S. E. Halcrow, T. Sayavongkhamdy, V. Souksavatdy, A prehistoric flexed human burial  
671 from Pha Phen, Middle Mekong Valley, Laos: its context in Southeast Asia. *Anthropol. Sci.* **123**,  
672 1–12 (2015).

- 673 97. D. Bulbeck, The Gua Cha burials. Concordance, chronology, demography (2001).
- 674 98. H. Matsumura, The population history of Southeast Asia viewed from morphometric analyses of  
675 human skeletal and dental remains. *of Southeast Asia. Cambridge University Press ...* (2006)  
676 (available at [https://books.google.com/books?hl=en&lr=&id=RrM7jKx-](https://books.google.com/books?hl=en&lr=&id=RrM7jKx-HysC&oi=fnd&pg=PA33&dq=population+history+Southeast+Asia+viewed+morphometric+analyses+human+skeletal+dental+remains+Matsumura&ots=YOKGYk9wSl&sig=huX6axFJ7_JkxIEcJl j1MNLPHI8)  
677 [HysC&oi=fnd&pg=PA33&dq=population+history+Southeast+Asia+viewed+morphometric+anal-](https://books.google.com/books?hl=en&lr=&id=RrM7jKx-HysC&oi=fnd&pg=PA33&dq=population+history+Southeast+Asia+viewed+morphometric+analyses+human+skeletal+dental+remains+Matsumura&ots=YOKGYk9wSl&sig=huX6axFJ7_JkxIEcJl j1MNLPHI8)  
678 [yses+human+skeletal+dental+remains+Matsumura&ots=YOKGYk9wSl&sig=huX6axFJ7\\_JkxIEcJl](https://books.google.com/books?hl=en&lr=&id=RrM7jKx-HysC&oi=fnd&pg=PA33&dq=population+history+Southeast+Asia+viewed+morphometric+analyses+human+skeletal+dental+remains+Matsumura&ots=YOKGYk9wSl&sig=huX6axFJ7_JkxIEcJl j1MNLPHI8)  
679 [j1MNLPHI8](https://books.google.com/books?hl=en&lr=&id=RrM7jKx-HysC&oi=fnd&pg=PA33&dq=population+history+Southeast+Asia+viewed+morphometric+analyses+human+skeletal+dental+remains+Matsumura&ots=YOKGYk9wSl&sig=huX6axFJ7_JkxIEcJl j1MNLPHI8)).
- 680 99. F. Demeter *et al.*, Tam Hang, a Palaeolithic site in Northern Laos: Preliminary results. *Asian*  
681 *Perspectives*. **48**, 291–308 (2010).
- 682 100. J. Fromaget, Les récentes découvertes anthropologiques dans les formations préhistoriques de  
683 la chaîne annamitique. *Government Printer, Singapore*, 51–59 (1940).
- 684 101. Nguyễn Kim Dung, Bùi Thu Phương, Bùi Văn Hiếu, Nguyễn Lâm Cường, Trần Trọng Hà,  
685 Nguyễn Thị Thủy, Khai quật di chỉ mộ táng ở Hòn Hai – Cô Tiên (Hạ Long) (Excavation Hon Hai  
686 Co Tien Cemetary site (Ha Long)). *Những phát hiện mới khảo cổ học (New Archaeological*  
687 *Discoveries)*, 155–158 (2005).
- 688 102. N. L. Cường, Hai bộ xương người cổ ở Nậm Tun (Lai Châu) (Two skeletons from Nam Tun  
689 (Lai Chau)). *Khảo cổ học*. **17**, 62–63 (1974).
- 690 103. V. H. Nguyễn Lâm Cường, Người cổ Nậm Tun (Nam Tun ancient human). *Khảo cổ học*. **17**,  
691 35–37 (1976).
- 692 104. A. Wipatayotin, Finding common ground. *Bangkok Post* (2018), (available at  
693 <https://www.bangkokpost.com/news/special-reports/1410471/finding-common-ground>).
- 694 105. R. Shoocongdej, in *Handbook of East and Southeast Asian Archaeology* (2017), pp. 97–109.
- 695 106. H.-C. Hung, thesis, Australian National University (2008).
- 696 107. H.-C. Hung, in *The First Islanders*, P. Bellwod, Ed. (Routledge, 2017), pp. 232–240.
- 697 108. F. Valentin, F. Déroit, M. J. T. Spriggs, S. Bedford, Early Lapita skeletons from Vanuatu show  
698 Polynesian craniofacial shape: Implications for Remote Oceanic settlement and Lapita origins.  
699 *Proc. Natl. Acad. Sci. U. S. A.* **113**, 292–297 (2016).
- 700 109. J.-C. Galipaud *et al.*, The Pain Haka burial ground on Flores: Indonesian evidence for a shared  
701 Neolithic belief system in Southeast Asia. *Antiquity*. **90**, 1505–1521 (2016).
- 702 110. K. Wiradnyana, Hoabinhian and Austronesia: The Root of Diversity in the Western Part of  
703 Indonesia. *European Scientific Journal, ESJ* (2016) (available at  
704 <https://www.listerz.com/index.php/esj/article/view/8388>).
- 705 111. S. Chia, Wood Coffin Burial of Kinabatangan, Sabah (2014).
- 706 112. A. McKenna *et al.*, The Genome Analysis Toolkit: a MapReduce framework for analyzing  
707 next-generation DNA sequencing data. *Genome Res.* **20**, 1297–1303 (2010).
- 708 113. R. E. Green *et al.*, A draft sequence of the Neandertal genome. *Science*. **328**, 710–722 (2010).



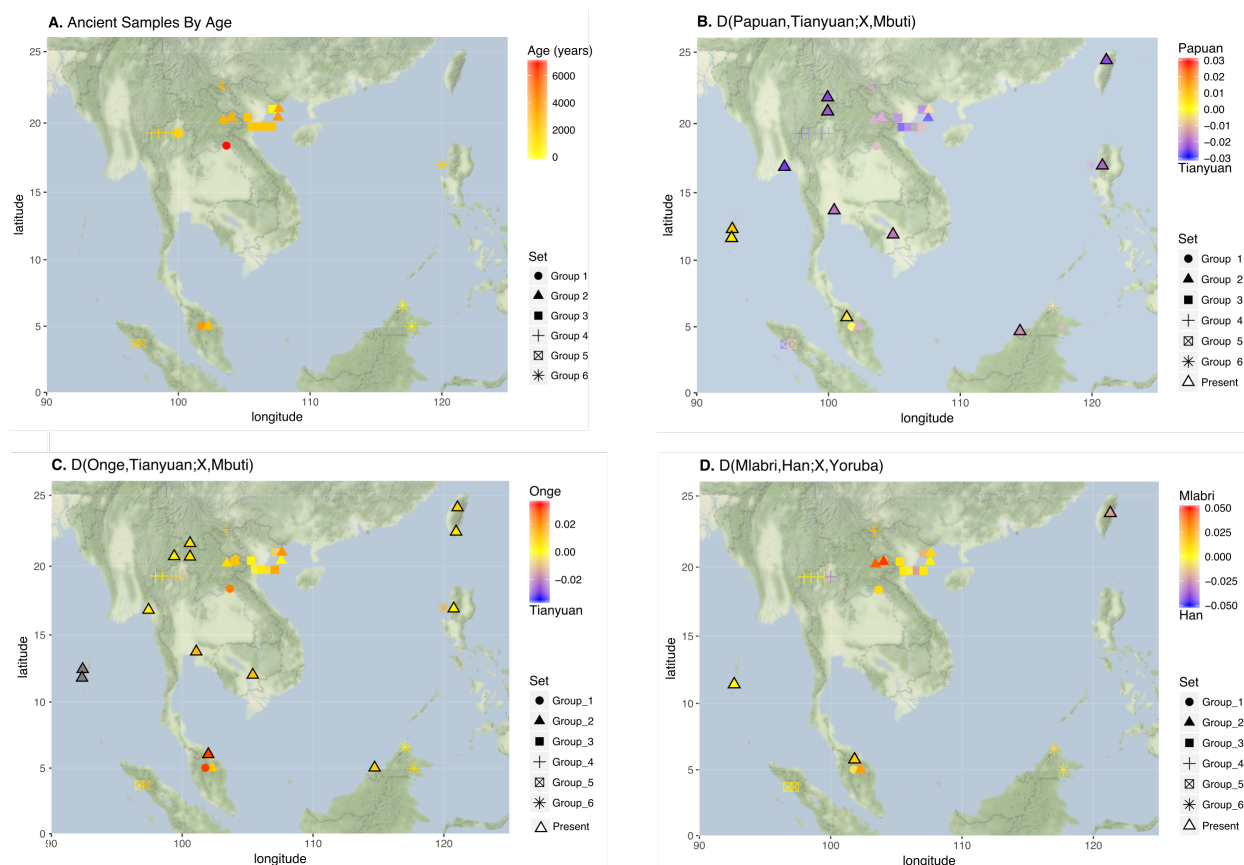

**Figure 2.** A) Estimated mean sample ages for ancient individuals. B) D-statistics testing for differential affinity between present-day Papuans and Tianyuan (2240k Panel). C) D-statistics testing for differential affinity between present-day Onge and Tianyuan (2240k Panel). D) D-statistics testing for differential affinity between present-day Mlabri and present-day Han Chinese (Pan-Asia Panel).

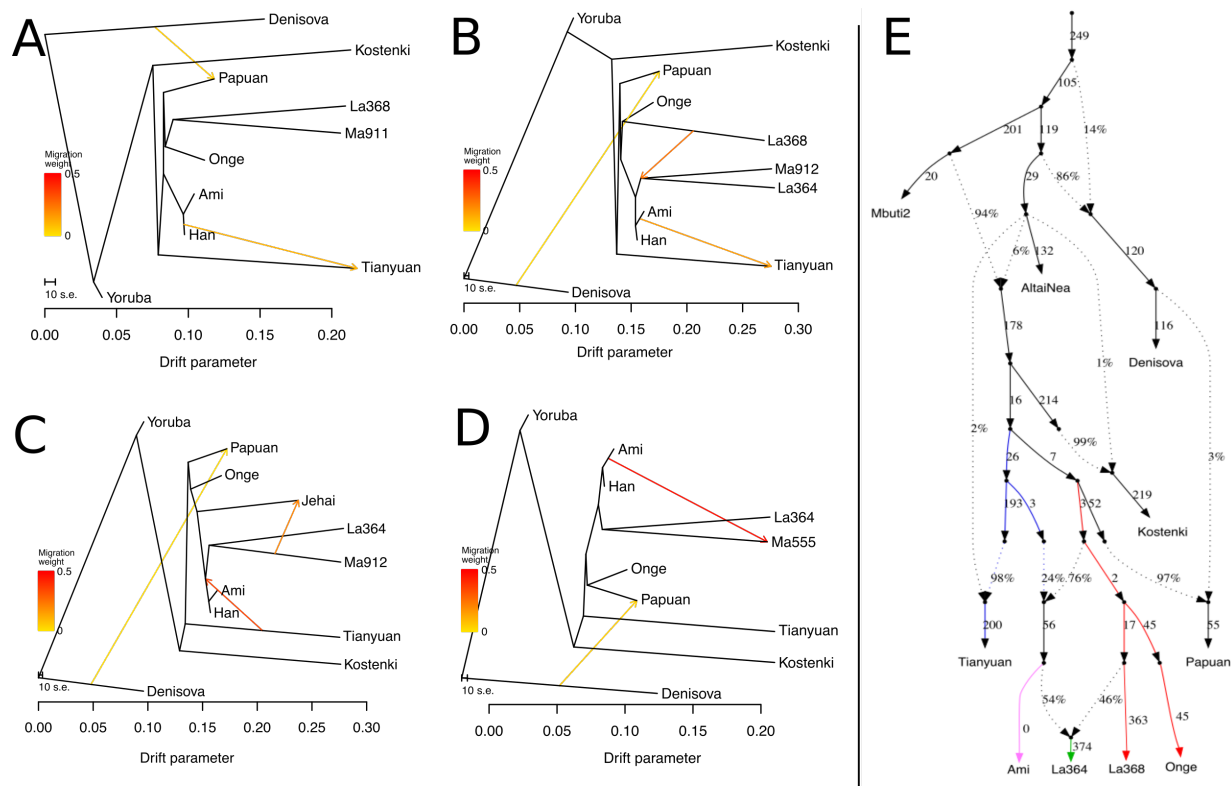

**Figure 3.** We used TreeMix to build admixture graphs combining present-day populations and select ancient samples with high SNP coverage. A) A graph including both Group 1 samples (Ma911 and La368) shows they can be fitted as sister groups with close affinities to present-day Onge. B) A graph including the highest coverage Group 1 (La368) individual and Group 2 (La368, Ma912) samples is best fit with Group 2 receiving ancestry from both Group 1 and the East Asian branch. C) A graph including the Group 2 individual and Jehai, showing admixture between Jehai and Ma912. D) TreeMix models Ma555 (Group 6) as receiving ancestry from both a branch leading to La364 (Group 2) and present-day Igorot. E) We used a graph framework inferred by Lipson et al. (61) and attempted to fit different ancient and present-day SEA individuals within that framework in *qpGraph*. Note that we model present-day East Asians (here represented by Ami) as a mixture of an Onge-like population and a population related to the Tianyuan ancient individual. La368 is best fitted as a sister group to Onge, while La364 is best fitted as a mixture of the ancient Onge-like population (represented by La368) and an East Asian population (represented by Ami) (worst-fitting  $Z = 3.667$ ).



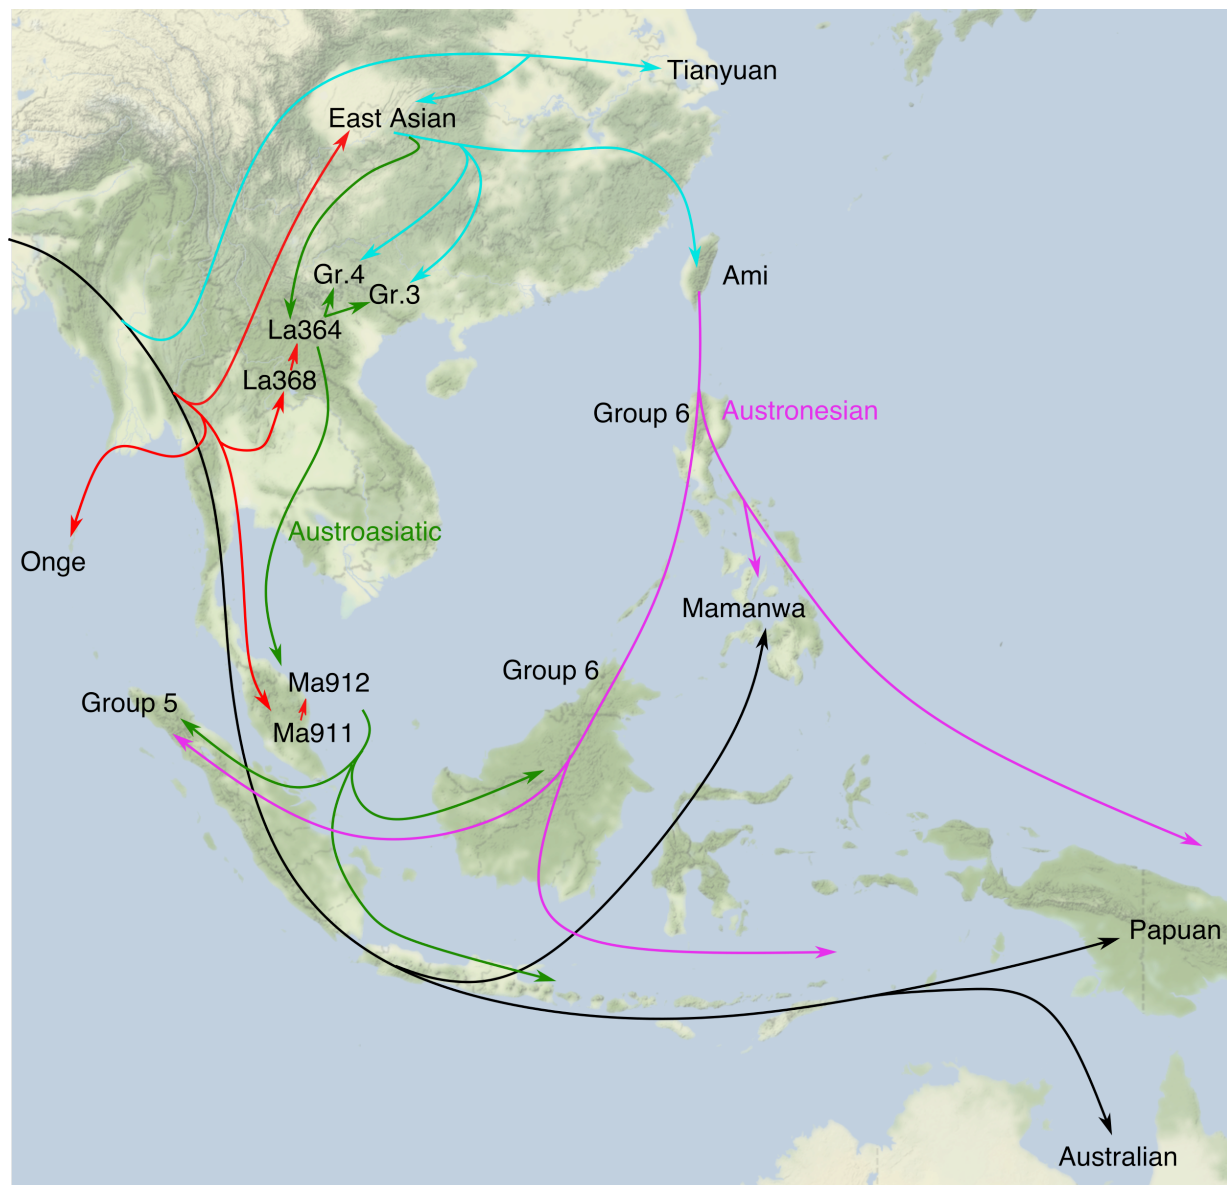

**Figure 4.** A model for plausible migration routes into Southeast Asia, based on the ancestry patterns observed in the ancient genomes.

**Table 1.** Meta-data for ancient samples, including IDs, radiocarbon dates and groups of similar ancestry into which they were placed for reference in the main text. A question mark denotes that a sample is of too low coverage to obtain information about genetic sex or haplogroup.

| Site | ID | Culture | Group | Calibrated date | Genetic Sex | Coverage | mt-haplogroup | Y-haplogroup |
|------|----|---------|-------|-----------------|-------------|----------|---------------|--------------|
|      |    |         |       |                 |             |          |               |              |



|                                    |       |                                               |    |            |    |       |         |            |
|------------------------------------|-------|-----------------------------------------------|----|------------|----|-------|---------|------------|
| Pha Faen<br>(Laos)                 | La368 | Hunter-gatherer,<br>Hoabinhian, flexed burial | 1  | 7888 ± 40  | XY | 0.603 | M5      | C          |
| Gua Cha (Malaysia)                 | Ma911 | Phase 1 - Hoabinhian                          | 1  | 4319 ± 64  | XY | 0.131 | M21b1a  | D          |
|                                    | Ma912 | Phase 2 - Neolithic farmer<br>cemetery        | 2  | 2447 ± 65  | XY | 1.729 | M13c    | O1b1a1a1b1 |
| Ma Dai Dieu<br>(Vietnam)           | Vt833 | Neolithic (upper layer)                       | 2  | 4171 ± 58  | XX | 0.128 | M20     | N/A        |
|                                    | Vt777 | Neolithic (upper layer)                       | 3  | 2276 ± 62  | XX | 0.147 | F1a1'4  | N/A        |
| Tam Hang (Laos)                    | La898 | Recent intrusion into<br>Hoabinhian           | 2  | -          | XY | 0.114 | N9a6    | O          |
|                                    | La727 |                                               | 2  | 2335 ± 14  | XX | 0.942 | N9a6    | N/A        |
| Tam Pa Ping (Laos)                 | La364 | Late Neolithic-Bronze Age                     | 2  | 2996 ± 47  | XY | 1.451 | F1a1a1  | O          |
| Hon Hai Co Tien<br>(Vietnam)       | Vt880 | Neolithic - Ha Long<br>Culture                | 2  | ~3.5kya    | ?  | 0.103 | ?       | ?          |
|                                    | Vt719 | Intrusive burial                              | 3* | 229 ± 69   | XX | 0.257 | M7c2    | N/A        |
| Nam Tun (Vietnam)                  | Vt778 | Late Neolithic                                | 4* | 2652 ± 83  | XY | 0.147 | F1a1a1  | O2a2b1a2a1 |
| Nui Nap (Vietnam)                  | Vt808 | Dong Son Culture                              | 3  | 2257 ± 75  | XX | 0.118 | M7b1a1  | N/A        |
|                                    | Vt781 |                                               | 3  | 2260 ± 64  | XX | 0.139 | F1a     | N/A        |
|                                    | Vt779 |                                               | 3  | 2256 ± 63  | XX | 0.141 | M7c1b2b | N/A        |
|                                    | Vt796 |                                               | 3  | 2177 ± 116 | XX | 0.110 | F1e3    | N/A        |
| Long Long Rak<br>(Thailand)        | Th519 | Iron Age                                      | 4  | 1731 ± 51  | XY | 0.161 | B5a1d   | N          |
|                                    | Th521 |                                               | 4  | 1712 ± 59  | XY | 0.422 | F1f     | O1b1a1a1b  |
|                                    | Th703 |                                               | 4  | 1669 ± 36  | XY | 0.163 | B5a1d   | NO         |
|                                    | Th531 |                                               | 3* | 1597 ± 34  | XX | 0.086 | G2b1a   | N/A        |
|                                    | Th530 |                                               | 4  | 1668 ± 36  | XY | 0.196 | G2b1a   | IJK        |
| Loyang Ujung<br>Karung (Indonesia) | In661 | Late Neolithic-Iron Age,<br>flexed burials    | 5  | 1866 ± 26  | XX | 0.105 | F1a1a   | N/A        |

|                             |          |                                       |   |           |    |       |                 |          |
|-----------------------------|----------|---------------------------------------|---|-----------|----|-------|-----------------|----------|
|                             | In662    |                                       | 5 | 2199 ± 82 | XY | 0.143 | M20             | O1b      |
| Nagsabaran<br>(Philippines) | Iron Age | Red-slipped pottery -<br>Austronesian | 6 | 1818 ± 44 | ?  | 0.029 | ?               | ?        |
| Supu Hujung 4               | Ma554    | Historical                            | 6 | 424 ± 68  | XY | 0.343 | F3b1a+160<br>93 | O        |
| Kinabatangan                | Ma555    | Historical                            | 6 | 231 ± 69  | XY | 0.549 | B4b1a2          | O2a2a1a2 |

759

760

761 **List of Supplementary Materials:**

762 SOM1. Assessment of target enrichment methods

763 SOM2. Archaeological Overview

764 SOM3. Mapping

765 SOM4. Principal Component Analysis

766 SOM5. ADMIXTURE fitting

767 SOM6. f3 Statistics

768 SOM7. D-statistics

769 SOM8. TreeMix fitting

770 SOM9. qpGraph fitting

771 SOM10. Measurements of archaic ancestry

772 Table S1 - S19

773 Fig S1 - S41

774 Supplementary References: 89-115

775

776

777

778

779

780

781

782
